# Supplementary material
Source: PubMed Central journal article supplement (PMC4763544)
Supplement: NIHMS65309-supplement-Suppl.pdf [file NIHMS65309-supplement-Suppl.pdf]

**Supplemental Information**

**Current Biology, Volume 21**

**ATP Hydrolysis Is Required  
for Relocating Cohesin from Sites  
Occupied by Its Scc2/4 Loading Complex**

**Bin Hu, Takehiko Itoh, Ajay Mishra, Yuki Katoh, Kok-Lung Chan, William Upcher, Camilla Godlee, Maurici B. Roig, Katsuhiko Shirahige, and Kim Nasmyth**

**Figure S1.**

**A.**

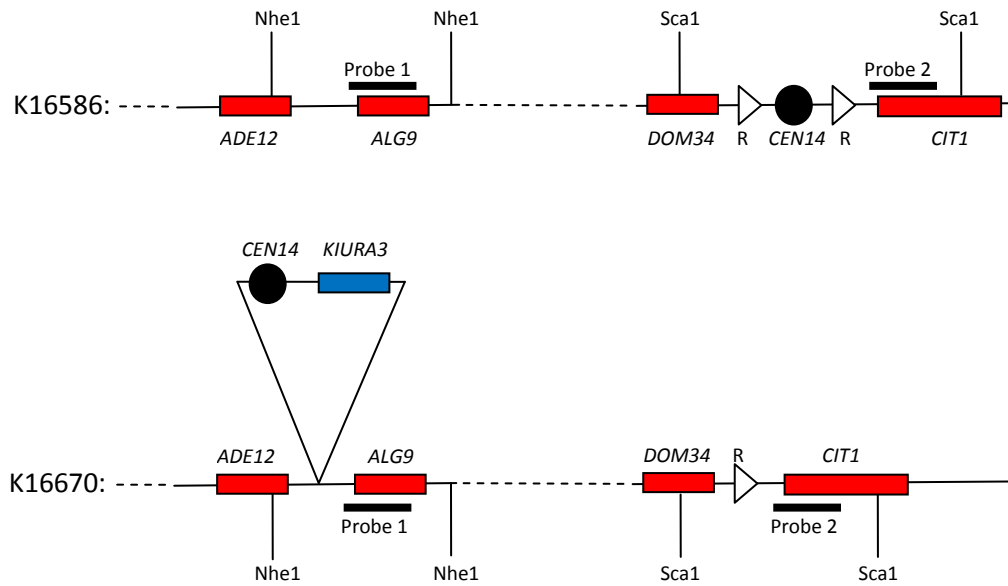

**B.**

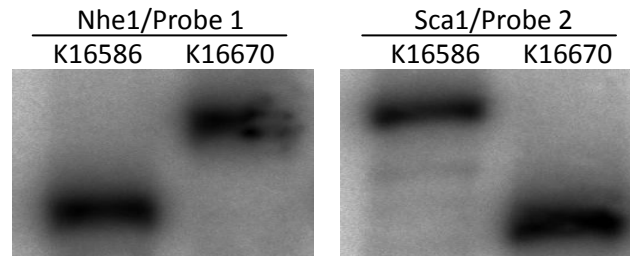

**C.**

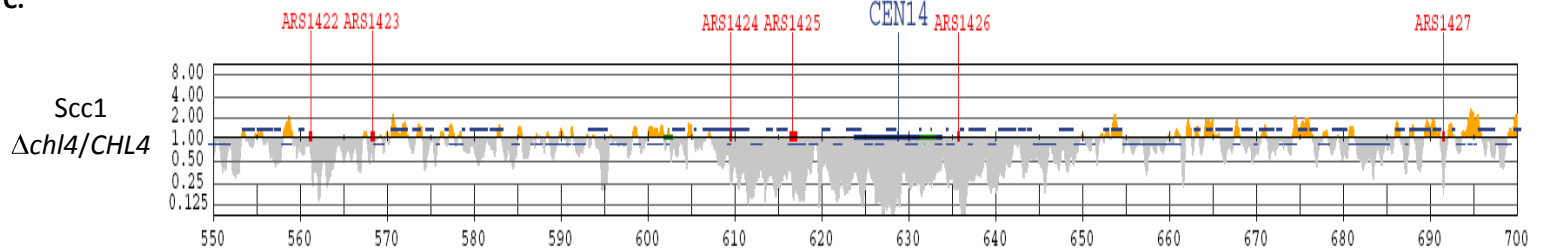

Figure S1. Centromeres promoter cohesin's accumulation at core-cen and peri-cen, related to Figure 1

(A) Strategy for translocation of cen14 into the site between ADE12 and ALG9 .

(B) Genome DNA extracted from yeast strains K16586 and K16670 were digested by Nhe1 or Sca1 and applied to Southern blot with indicated probe.

(C) Chl4 promotes recruitment of cohesin to centromeres. The ratios of Scc1 ChIP-SEQ signals between Chl4 WT and deletion were mapped to Chromosome XIV.

**Figure S2.**

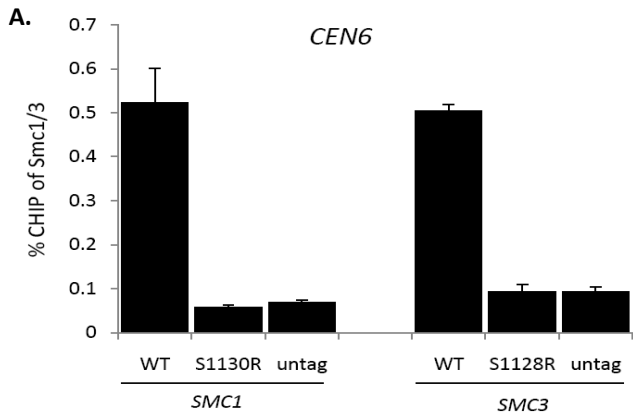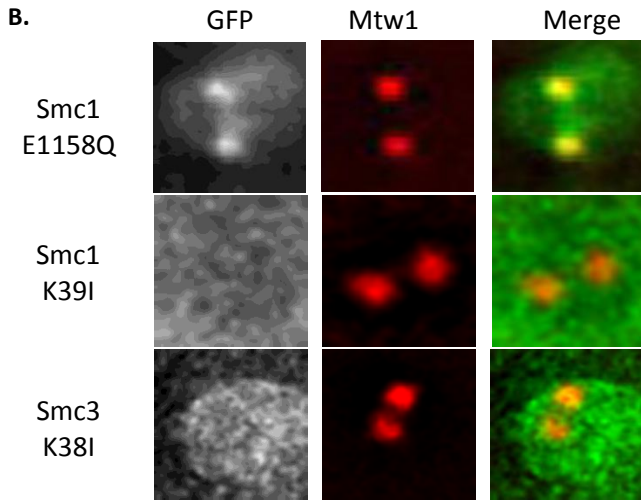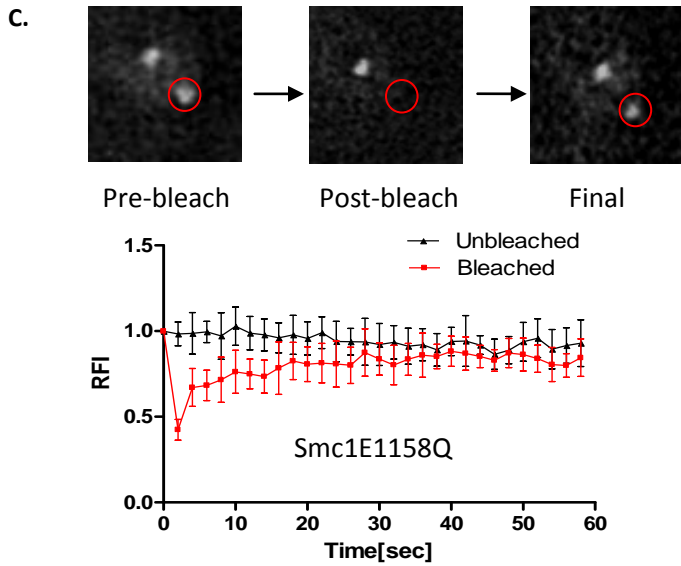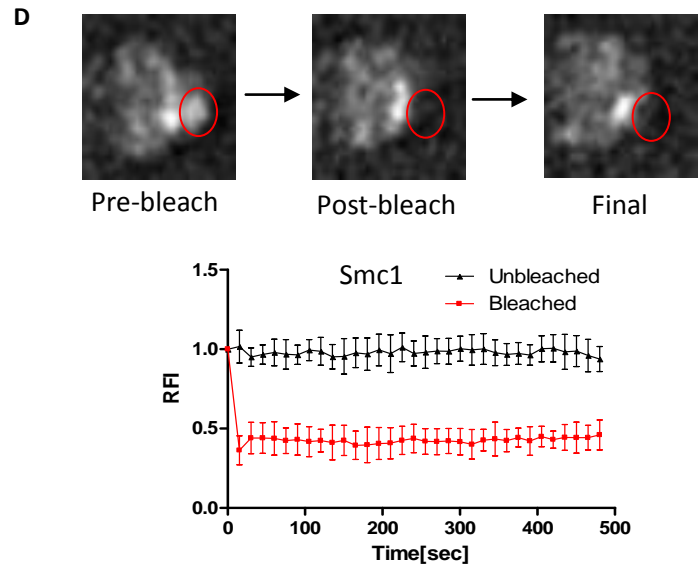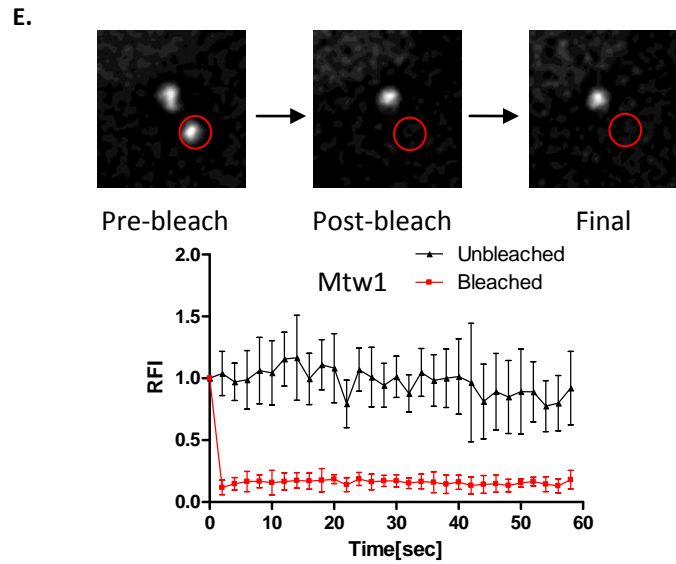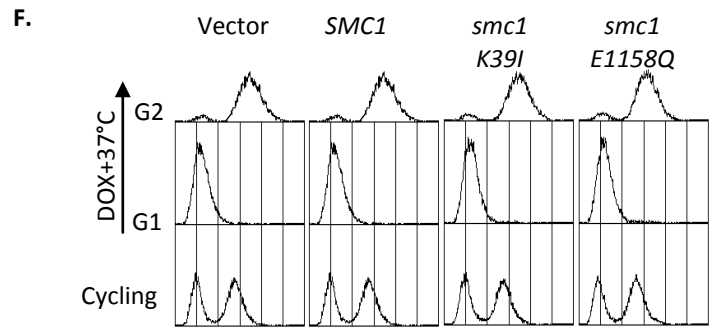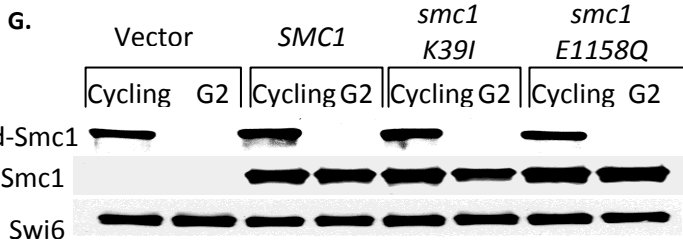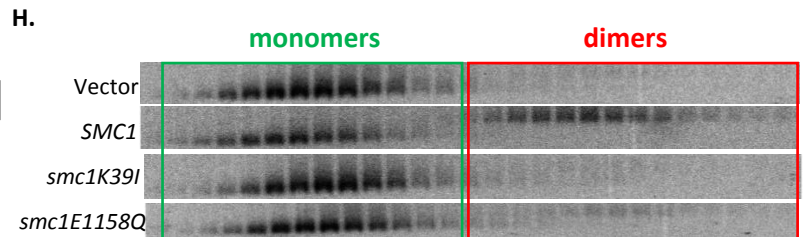

Figure S2. ATP-dependent engagement of nucleotide binding domains of Smc1/3 is required for cohesin's association at centromere, related to Figure 2

(A) Mutations in signal motif of Smc1/3 prevent chromatin association. ChIP-qPCR was performed for the quantitative measurement of chromatin association of Myc9 or HA3 tagged Smc1/3 WT and corresponding signal motif mutants (K699, K11850, K11852, K11854 and K11574) at Cen6. Error bars represent std. dev.; n=3.

(B) Localization of Smc1E1158Q, Smc1K391 and Smc3K38I. Live cell imaging showed GFP tagged Smc1E1158Q (K16445) colocalized with Mtw1, whereas Smc1K391-GFP was excluded from nuclear and Smc3K38I-GFP showed a diffused nuclear signal.

(C) Association of Smc1E1158Q at centromere was dynamic. FRAP assay revealed Smc3E1155Q-GFP rapidly recovered with  $t_{1/2} = 3.8$  sec after photobleach; n=6; *error bars* represent std dev.

(D) and (E) Stability of association of Smc1 and Mtw1 with chromosomes in centomeric regions. FRAP assay revealed Smc1 (D) and Mtw1 (E) stably associated with centromeres or peri-cen (K16444).

(F-H) Hydrolysis defective cohesin cannot establish cohesion. Exponential phase cells of strains (K16335-8) were arrested at G1 with  $\alpha$ -factor at 25°C. Endogenous td-Smc1 was degraded by shifting cultures to the degnon-mediated proteolysis conditions (YEP gal, 20  $\mu$ g/ml doxycycline, 37°C) for 1 hr (F). Subsequently the cells were released from G1 arrest to YEP gal media containing 20  $\mu$ g/ml doxycycline and 10  $\mu$ g/ml nocodazole. The cells were lysed and extracts were fractionated by sucrose gradient centrifugation followed by gel electrophoresis. FACS analysis showed that all strains completed DNA replication in the above conditions (F) and degradation of endogenous degnon tagged Smc1 were measured by western blot (G). Minichromosome DNA was detected by Southern blotting. Monomers and dimers are marked inside the green and red boxes respectively (H).

**Figure S3.**

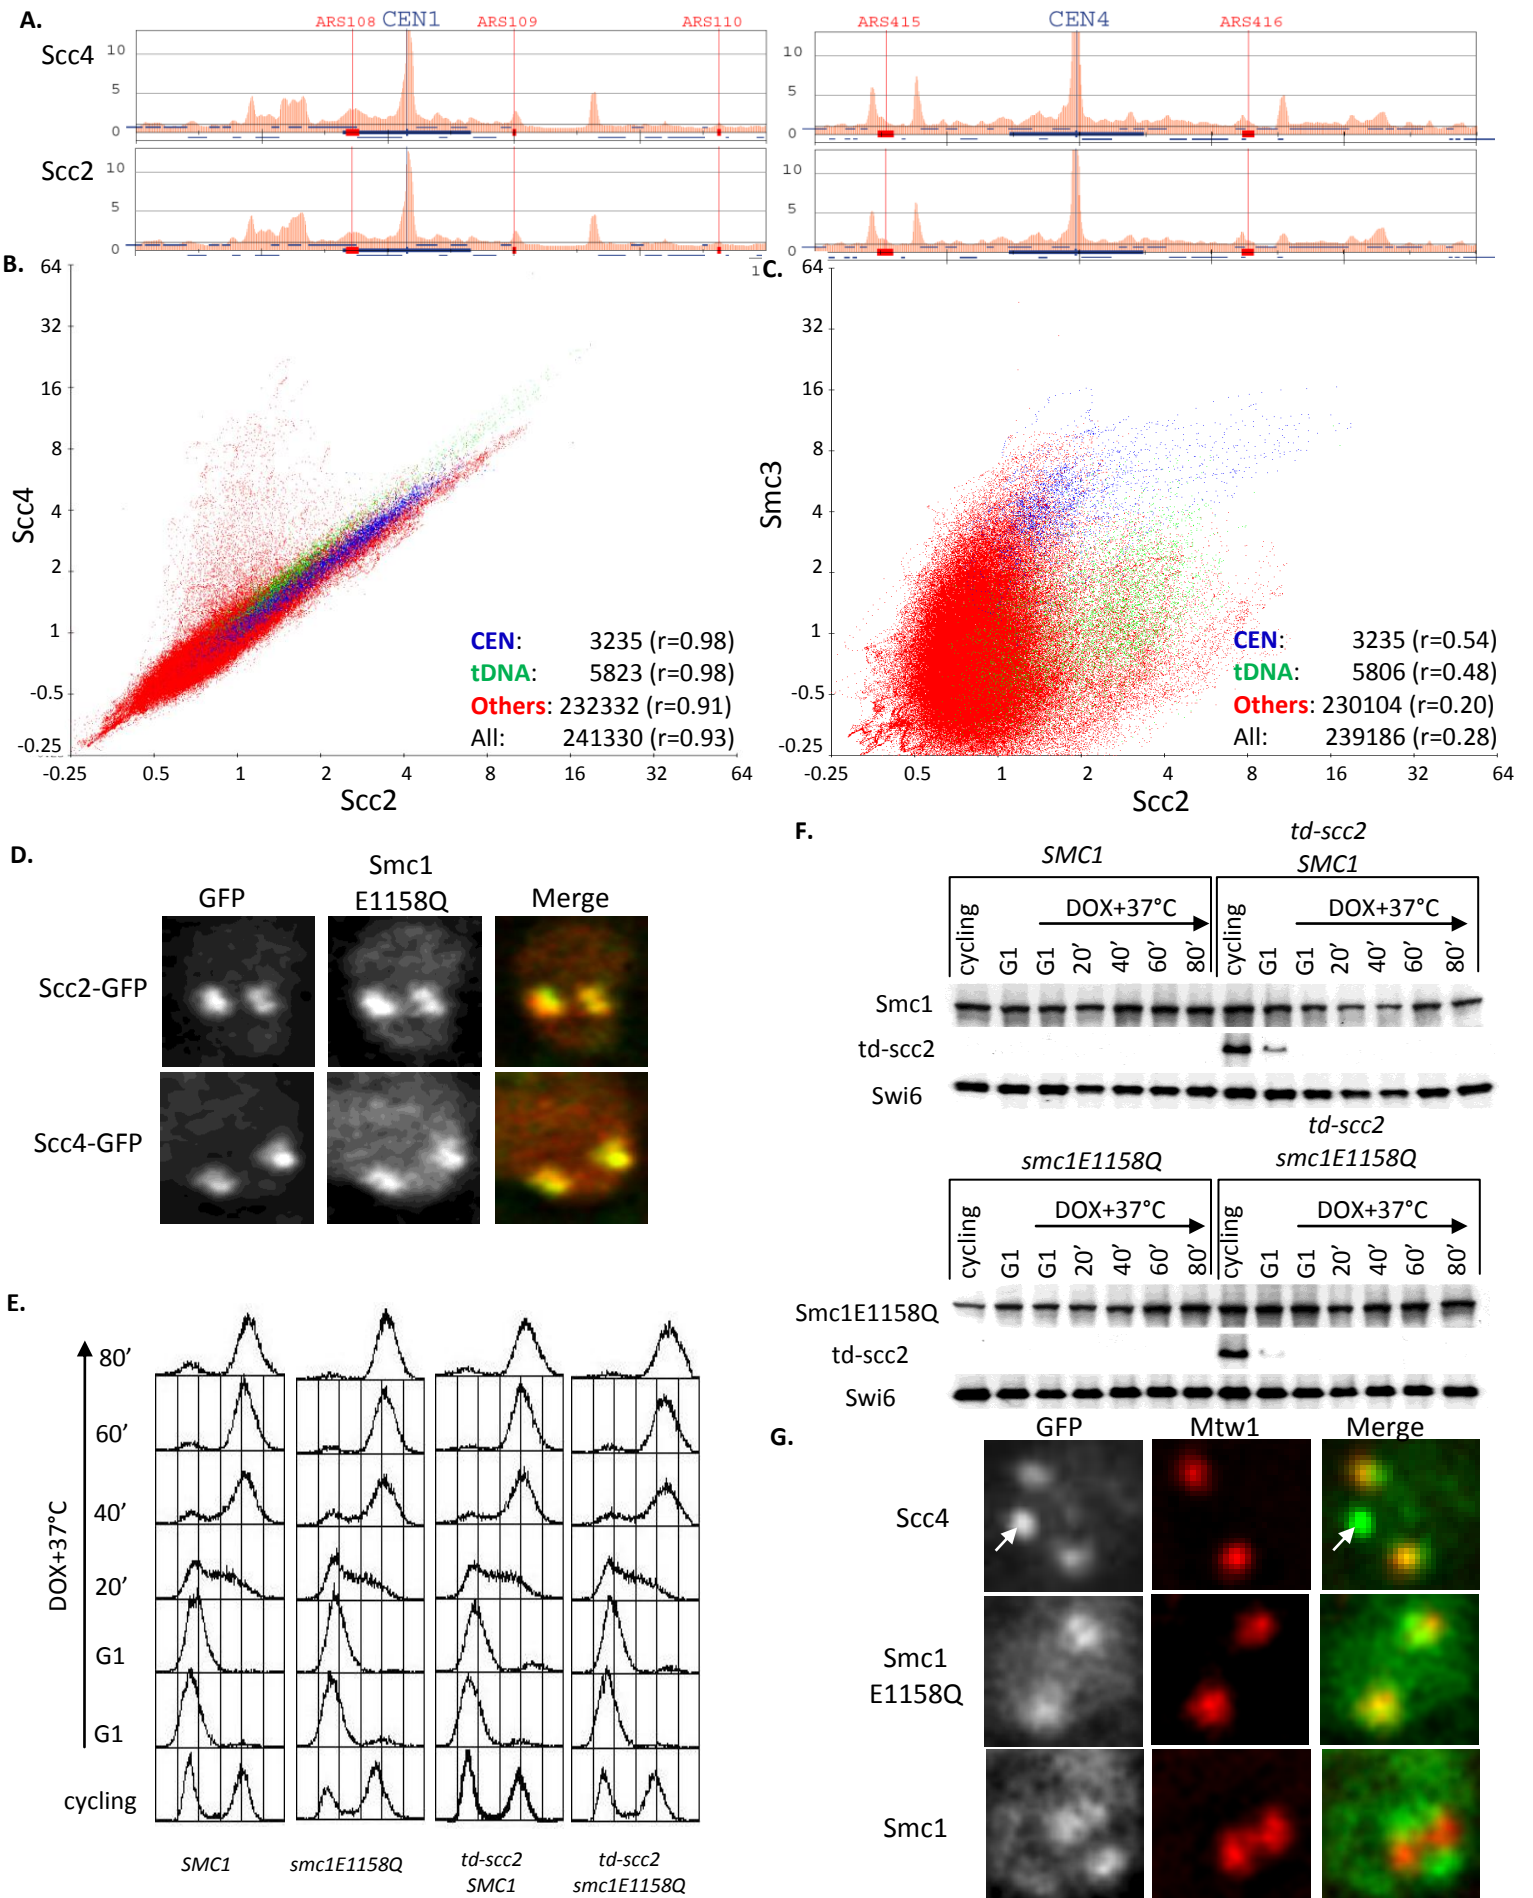

Figure S3. Hydrolysis defective cohesin co-localized with and depends on Scc2/4, related to Figure 3

(A) Genome-wide distribution of Scc2 and Scc4. Crude extracts prepared from exponentially grown yeast cells (K17458 and K17459) were used for ChIP-SEQ analyses. The distributions of Scc2 and Scc4 at a selected region of chromosome I (top panel) and IV (bottom panel) were shown.

(B) Correlation of Scc2 with Scc2 performed as described in Figure 2C.

(C) Correlation of Smc3 with Scc2 performed as described in Figure 2C.

(D) Hydrolysis defective cohesin co-localized with Scc2/4. Live cell imaging showed RFP tagged Smc1E1158Q (K17026 and K17027) colocalized with Scc2-GFP or Scc4-GFP.

(E) and (F) FACS analysis and Western bolt for Figure 3E.

(G) Artificial tethering of Scc2-tTR to a cluster of Tet operators recruits Scc4 but not hydrolysis defective cohesin. Scc4-GFP, or Smc1E1158Q-GFP was expressed in strains containing 224x Tet operators inserted 38 Kb from CEN5 whose endogenous Scc2 was fused with tTR (K16535 and K16537). Scc4-GFP forms an extra focus indicated by an arrow at URA3 as well as a pair of centromeric foci co-localizing with Mtw1-RFP. In contrast, Smc1E1158Q-GFP only co-localizes with Mtw1-RFP clusters.

Figure S4.

A.

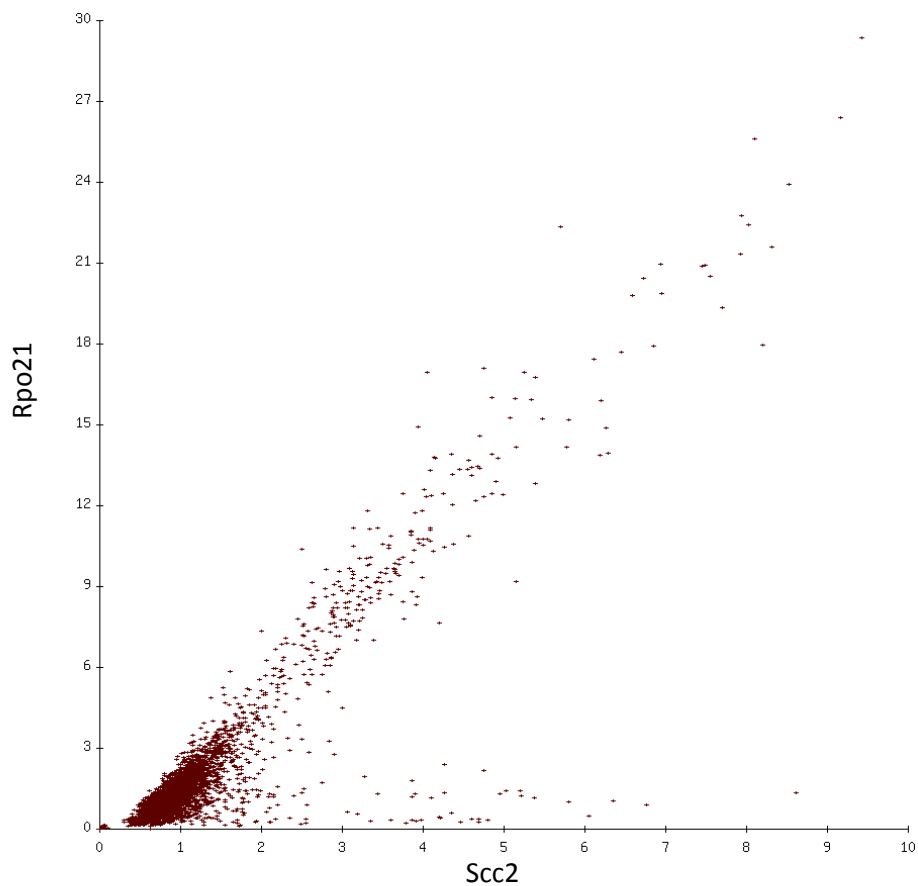

B.

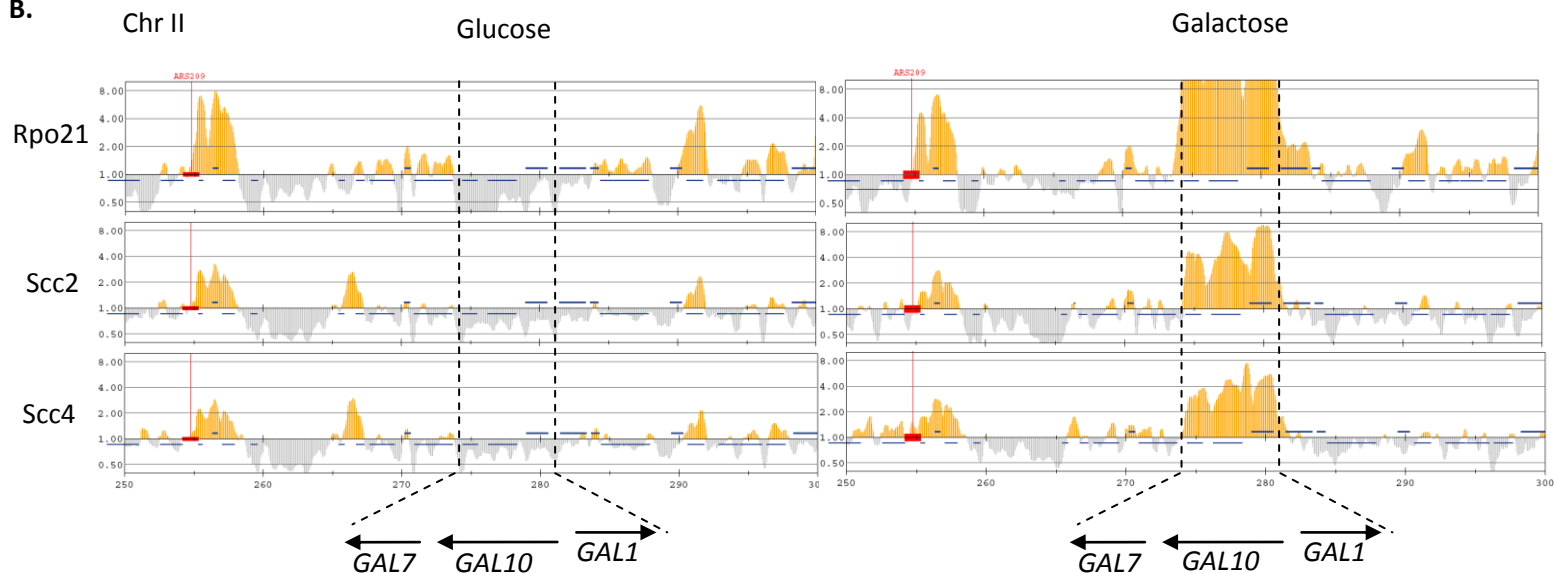

Figure S4. Correlation of Rpo21 with Scc2 at ORFs, related to Figure 4

(A) The ChIP-SEQ signals of Rpo21 and Scc2 at ORFs were used to calculate the correlation of Rpo21 with Scc2.

(B) Galactose-induced association of Rpo21 and Scc2/4 at a cluster of galactose-inducible genes. Exponentially-grown cells in glucose or galactose were used for ChIP-SEQ. Scc2/4 association was greatly increased at all 26 genes that associated with Pol II only in galactose and reduced at all 9 nine repressed by galactose. See also Figure 4.

**Figure S5.**

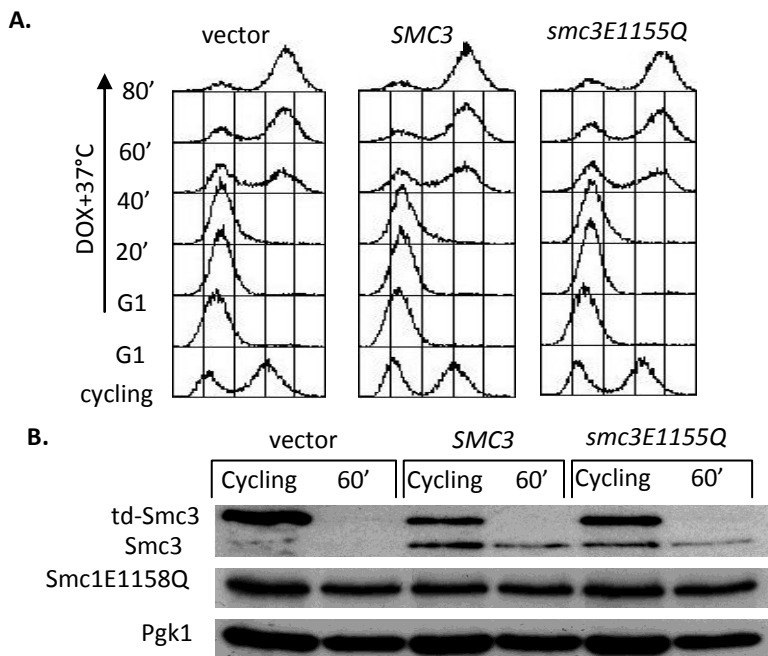

Figure S5. Cohesin completely blocked with NBDs stably engaged associates with centromeres

Cohesin incapable of hydrolysing ATP associated with both NBDs associates with centromeres. Exponential phase cells of strains K16331, K17240, K17241 and K17242 growing at 25°C were arrested in G1 with  $\alpha$ -factor. Degradation of Smc3-td was induced and cells released from pheromone as in Figure 2E. (A) The DNA contents were measured by FACS. (B) The Smc3 proteins were detected by Weston blot.



**Figure S6.**

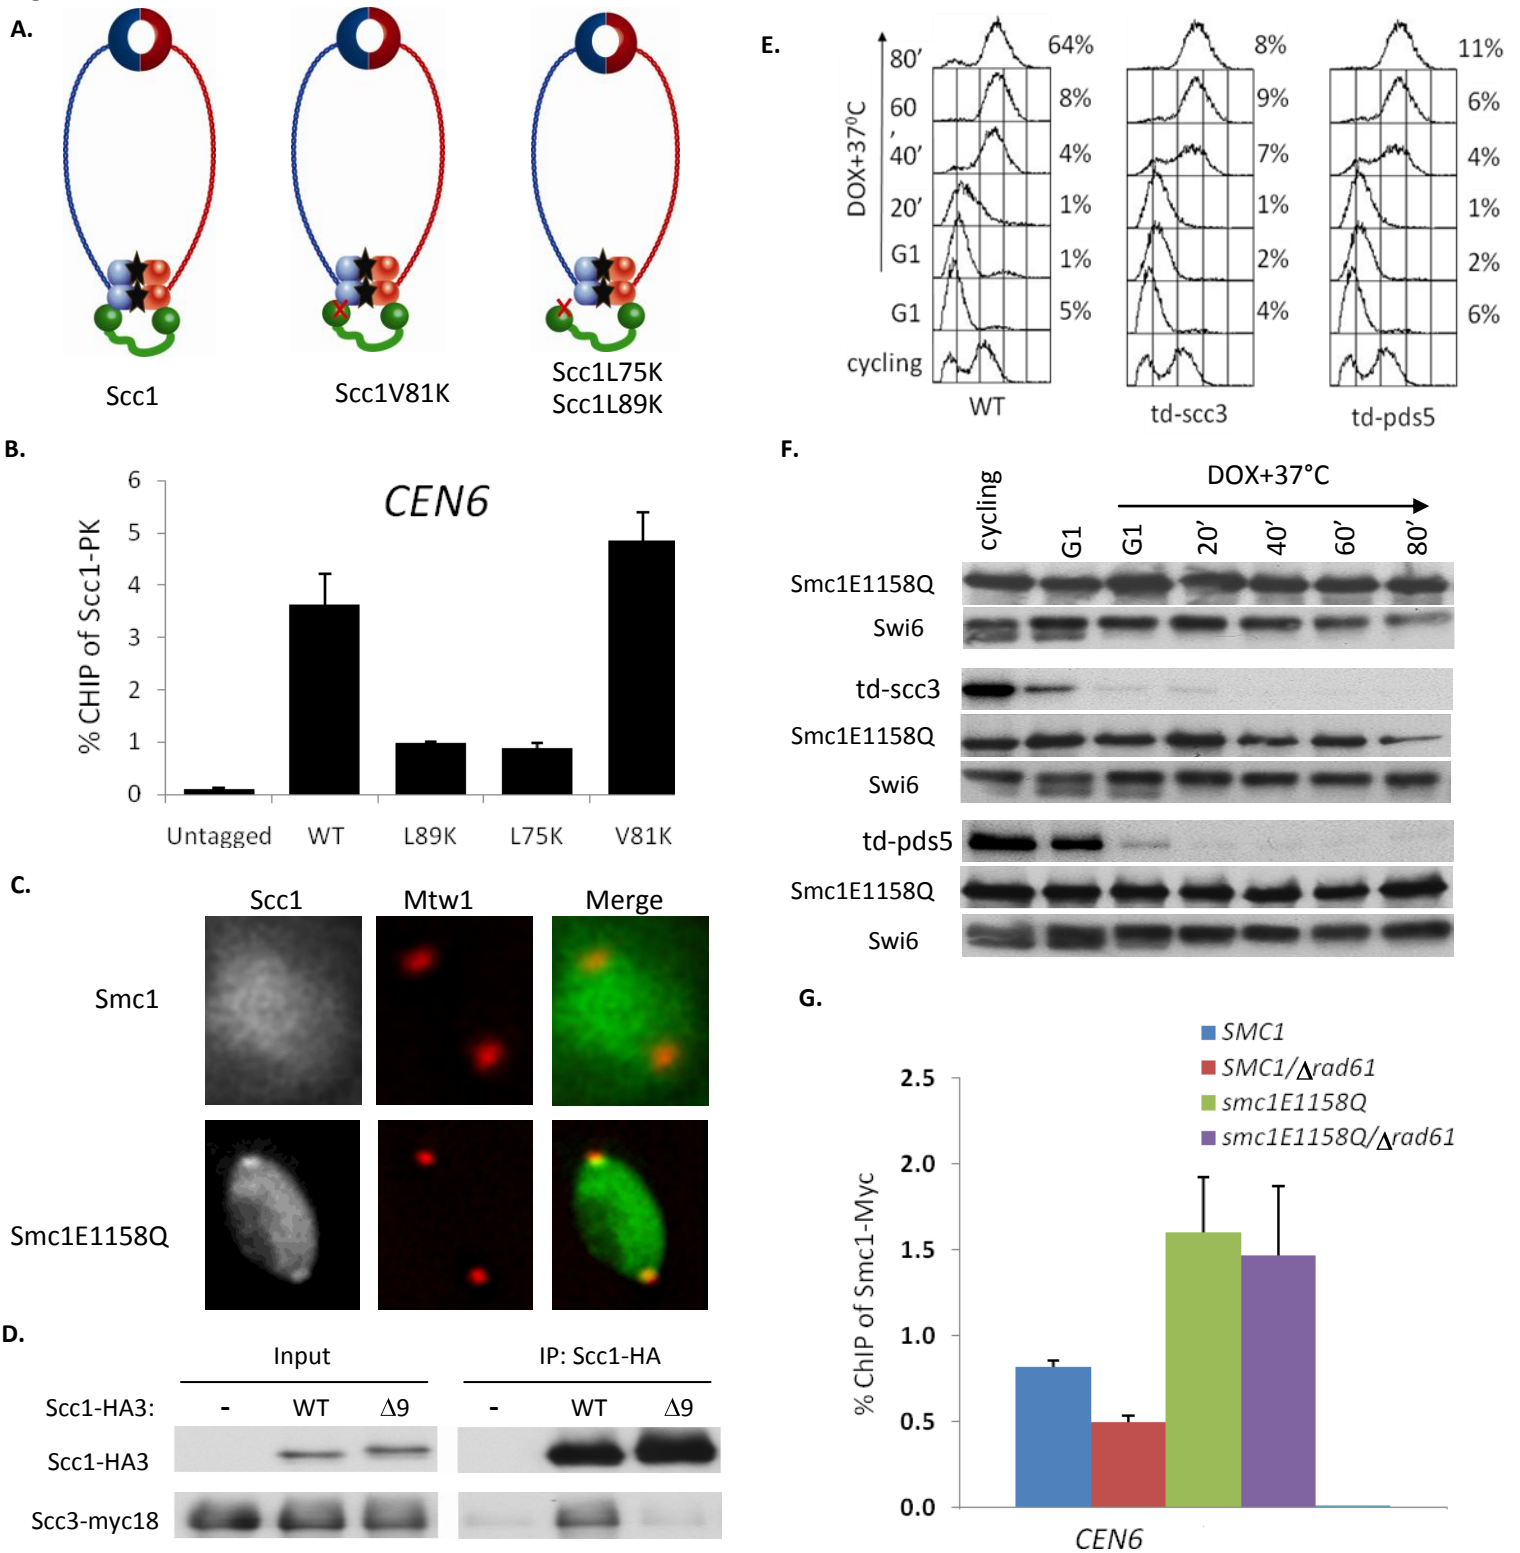

Figure S6. Ring formation and Scc3 are required for cohesin loading, related to Figure 6

(A) Mutations within Scc1's N-terminal domain that disrupt its interaction with Smc3's NBD.

(B) Ring formation is required for cohesin loading. ChIP-qPCR was performed for the quantitative measurement of chromatin association of PK9 tagged Scc1 WT and indicated mutants at Cen6. Mutations of L89K and L75K dramatically reduced Scc1 chromatin association. Error bars represent std. dev.; n=3.

(C) Localization of Scc1 with extra copy Smc1 or Smc1E1158Q during anaphase. Scc1-GFP co-expressed with extra copy Smc1 showed diffused localization in the nuclear, whereas Scc1-GFP co-expressed with Smc1E1158Q co-localized with Mtw1 during anaphase.

(D) Deletion of 9 amino acid residues ( $\Delta$ 319-327) within Scc1 disrupts its interaction with Scc3. Yeast strains (K16634 and K16968) were grown to log phase in YPD medium. Cleared extracts were immunoprecipitated with anti-HA antibodies and Scc1-HA3 and Scc3-myc18 were detected with anti-HA and anti-myc antibodies, respectively. Scc1 $\Delta$ 319-327 ( $\Delta$ 9) cannot interact with Scc3.

(E) and (F) FACS analysis and Western bolt for Figure 6E.

(G) Association of myc9-tagged Smc1 or Smc1E1158Q with CEN6 measured by ChIP-qPCR in asynchronous YPD cultures of strains K699, K11850, K11857, K16780 and K16782. Error bars represent std. dev.; n=3.

**Figure S7.**

**A.**

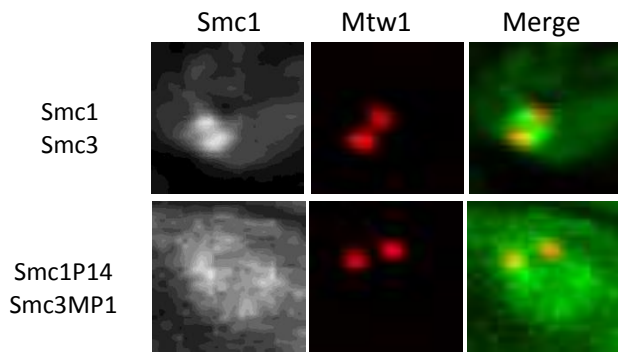

**B.**

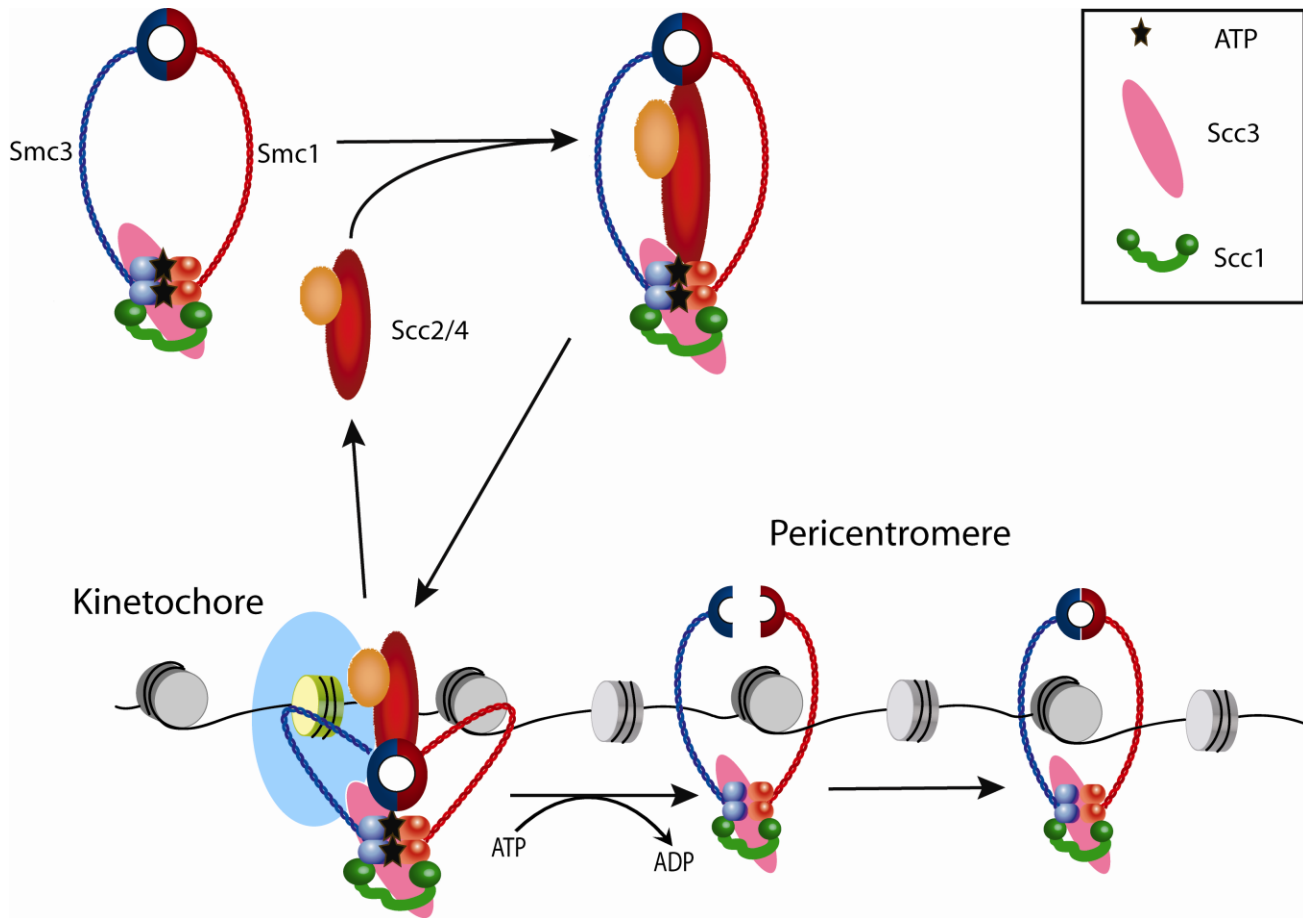

Figure S7. Smc1/3 hinges are required for cohesin loading, related to Figure 7

(A) Hinge-substituted SMC heterodimers cannot be recruited to chromatin. Smc1-GFP or Smc1P14-GFP was co-expressed with extra copy of Smc3 or Smc3MP1 (K16946 and K16964). The GFP-fused proteins were visualized by fluorescence microscopy. As expected, Smc1-GFP formed a barrel structure. But the hinge-substitution of Smc1P14-GFP showed a diffused nuclear signal.

(B) Model for Scc2-dependent chromatin loading of cohesin. Following formation of tripartite rings and association with Scc3, ATP-driven NBD engagement and Scc2/4 promotes association with kinetochore proteins (blue) and interaction of closed SMC hinges with engaged NBDs. Hinges are opened by disengagement of NBDs driven by

ATP hydrolysis. Subsequent hinge re-association leads to chromatin entrapment, which then permits translocation from the initial entrapment site.

## Supplemental Experimental Procedures

### Chromatin Immunoprecipitation - Sequence assay:

Chromatin immunoprecipitation was carried out as previously described (Katou et al, 2003). DNA from WCE and ChIP fraction were further sheared to the average size of 150bp by ultra sonicator Covaris (Covaris, Inc.), end-repaired, ligated to sequencing adapters and amplified according to manufacturers instructions (Applied Biosystems SOLiD Library Preparation Protocol). Gel-purified amplified DNA between 100 and 150bp was sequenced on the Applied Biosystems Solid 3.5 platform to generate 50-bp reads. Sequence reads were aligned to the *S. cerevisiae* reference genome using Corona\_lite (Applied Biosystems) allowing 3 color space mismatches. More than 10 million reads were successfully mapped for each sample (coverage is higher than 92% and redundancy is more than 10 folds for each sample). Aligned reads were extended to 100 bp in the 3' direction. As inclusion of the repetitive data in ChIP-Seq experiments is critical for a complete understanding of protein localization along the chromosome (Rosenfeld *et al.*, 2009), sequence reads mapped to repetitive sequences were divided equally amongst all locations where the repetitive sequence appeared, treating each repetitive sequence as being equally responsible for the resulting sequencing read. The number of reads were summed up in a 500-bp window with a step size of 50-bp along the chromosome for ChIP and WCE fractions, respectively. After normalization of total reads of ChIP fraction against WCE fraction, enrichment values (ChIP/WCE) were calculated as previously described for each window and presented (Katou et al., 2003). All data were available from Gene Expression Omnibus (GEO) database with series number of **GSEXXXX**.

### Purification of Smc1 and Smc3 head domains:

Smc3hd (M1-E190, 18 amino acid linker S1022-V1230) and Scc1-C (F451-A566) were fused to a 6xHis tag at the C-terminus in pET21 vectors. Smc1hd (M1-Q177, 31 amino acid linker, N1036-E1225) was cloned into a pET28 vector. Hydrolysis mutations (Smc1hdE1158Q, Smc3hdE1155Q) were introduced by site-directed mutagenesis PCR. Cells of the *E. coli* strain BL21(DE3)-RIPL were transformed with Smc3hd and co-transformed with Scc1-C and Smc1hd. Cultures were grown at 37°C until reaching an OD600 of 0.6, and expression was induced by addition of 1mM IPTG, for 12 hours at 20°C. Cells were harvested and resuspended in lysis buffer (50 mM Tris-HCl, pH 7.5, 250 mM NaCl, 1mM PMSF and complete protease inhibitor mix (Roche)) and lysed by French press (Constant System, UK) at 17 Kpsi. The supernatant was incubated with Talon Superflow beads (Clontech) for 2 hours at 4°C. Beads were washed with lysis buffer containing 10 mM imidazole (Sigma). Proteins were eluted in lysis buffer with 250mM imidazole and loaded onto a Superdex 200 16/60 size exclusion chromatography column (GE Healthcare) equilibrated with a buffer consisting of 100mM NaCl, 50mM Tris-HCl, pH 7.5, and 1mM  $\beta$ -ME. Peak fractions were collected and concentrated using Vivaspin columns (Sartorius Stedim biotech).

### Analytical gelfiltration for binding analysis:

Superdex 200 10/300 GL gelfiltration columns (GE Healthcare) were used to investigate dimerisation between Smc1hd(1158Q)/Scc1-C and Smc3hd(1155Q). Before gel filtration, proteins were incubated at room temperature for 15 minutes. 100µl of 30µM Smc1hd/Scc1-C and Smc3hd were loaded together in the presence or absence of ATP at 0.5mM in a buffer consisting of 200mM NaCl, 50mM Tris-HCl, pH 7.5, 0.5mM MgCl<sub>2</sub>. Fractions collected for each run were run on 11% SDS-PAGE and the proteins were visualized by Coomassie staining.

### **Depletion of degron fused proteins:**

Exponentially grown yeast cells was arrested in G1 phase by adding 0.5 ng/ml  $\alpha$ -factor and 0.5 µg/ml doxycycline at 25°C for 2.5 hours. To deplete degron fused proteins, cells were transferred into YPD medium containing 0.5 ng/ml of  $\alpha$ -factor and 20 µg/ml of doxycycline at 37°C for 1 hour. Subsequently, cells were released from G1 arrest by being transferred in YPD medium containing 20 µg/ml of doxycycline and incubated at 37°C.

### **Co-immunoprecipitation assays:**

Spheroplasts of yeast cells were prepared by zymolase and lysed in the lysis buffer (100mM KCl, 15mM MgCl<sub>2</sub>, 0.025% Triton X100, 1mM DTT and 1mM PMSF). Protein concentration of the crude extract was measured by Bradford method. Five mg of the protein was incubated with anti-HA affinity matrix for 4 hours at 4°C. After washing 5 times with lysis buffer the matrix was boiled in 2X Lamelli buffer. Samples were run on a 7.5% SDS-PAGE. For western analysis anti-HA, anti-Myc, and anti-Smc6 antibodies were used to probe for Smc3, Scc3 and Scc1 respectively.

### **Other techniques**

Minichromosome cohesion assays were performed as described (Ivanov and Nasmyth, 2007). DNA content analysis (flow cytometry) were performed as described in Mishra *et al.*, 2010

**Table S1.** Summary of ChIP-SEQ

|              | Epitope tag | antibody          |     | all mapped |            |                 |                   |                    | uniquely mapped |                 |                   |                    |
|--------------|-------------|-------------------|-----|------------|------------|-----------------|-------------------|--------------------|-----------------|-----------------|-------------------|--------------------|
|              |             |                   |     | All Tag    | mapped Tag | mapped ratio(%) | covered region(%) | average redundancy | mapped Tag      | mapped ratio(%) | covered region(%) | average redundancy |
| Smc3         | HA3         | BABCO, MMS-101P   | IP  | 28,929,852 | 15,988,827 | 55.27           | 98.46             | 66.75              | 12,058,307      | 41.68           | 93.09             | 53.25              |
|              |             |                   | WCE | 27,155,235 | 15,883,057 | 58.49           | 98.19             | 66.50              | 12,124,888      | 44.65           | 92.75             | 53.74              |
| Smc3E1155Q   | HA3         | BABCO, MMS-101P   | IP  | 26,517,332 | 14,252,675 | 53.75           | 98.57             | 59.44              | 10,213,814      | 38.52           | 93.18             | 45.06              |
|              |             |                   | WCE | 25,494,590 | 14,649,054 | 57.46           | 98.27             | 61.28              | 11,728,829      | 46.01           | 92.87             | 51.92              |
| Scc2         | FLAG6       | Sigma, F3165      | IP  | 23,259,711 | 13,521,365 | 58.13           | 98.94             | 56.18              | 9,509,801       | 40.89           | 93.69             | 41.72              |
|              |             |                   | WCE | 31,573,873 | 17,153,868 | 54.33           | 98.78             | 71.39              | 13,544,778      | 42.90           | 93.55             | 59.52              |
| Scc4         | PK6         | Serotec, MCA 1360 | IP  | 24,758,698 | 13,381,314 | 54.05           | 98.92             | 55.61              | 9,997,636       | 40.38           | 93.67             | 43.88              |
|              |             |                   | WCE | 31,573,873 | 17,153,868 | 54.33           | 98.78             | 71.39              | 13,544,778      | 42.90           | 93.55             | 59.52              |
| Rpo21        | FLAG3       | Sigma, F3165      | IP  | 22,089,811 | 13,042,909 | 59.04           | 98.61             | 54.37              | 11,960,777      | 54.15           | 93.23             | 52.74              |
|              |             |                   | WCE | 31,573,873 | 17,153,868 | 54.33           | 98.78             | 71.39              | 13,544,778      | 42.90           | 93.55             | 59.52              |
| Scc1(K16586) | PK9         | Serotec, MCA 1360 | IP  | 24,089,599 | 14,498,107 | 60.18           | 97.97             | 60.83              | 11,068,507      | 45.95           | 92.49             | 49.20              |
|              |             |                   | WCE | 27,342,256 | 15,758,470 | 57.63           | 98.88             | 65.51              | 13,186,020      | 48.23           | 93.46             | 58.00              |
| Scc1(K16670) | PK9         | Serotec, MCA 1360 | IP  | 16,794,781 | 9,859,705  | 58.71           | 97.78             | 41.45              | 7,512,151       | 44.73           | 92.27             | 33.47              |
|              |             |                   | WCE | 24,242,112 | 12,746,042 | 52.58           | 98.49             | 53.20              | 7,780,383       | 32.09           | 93.06             | 38.80              |
| Rpc128       | FLAG6       | Sigma, F3165      | IP  | 9,070,646  | 4,569,270  | 50.37           | 91.33             | 20.57              | 3,071,951       | 33.87           | 85.65             | 14.74              |
|              |             |                   | WCE | 31,573,873 | 17,153,868 | 54.33           | 98.78             | 71.39              | 13,544,778      | 42.90           | 93.55             | 59.52              |
| Spt15        | FLAG6       | Sigma, F3165      | IP  | 8,200,526  | 4,410,241  | 53.78           | 94.88             | 19.11              | 2,994,441       | 36.52           | 89.27             | 13.79              |
|              |             |                   | WCE | 31,573,873 | 17,153,868 | 54.33           | 98.78             | 71.39              | 13,544,778      | 42.90           | 93.55             | 59.52              |

**Table S2.** List of Strains (all the strains were W303 background except indicated)

|        |                                                                                                                                                                                                                     |
|--------|---------------------------------------------------------------------------------------------------------------------------------------------------------------------------------------------------------------------|
| K699   | MATa, <i>ade2-1, trp1-1, can1-100, leu2-3, 112, his3-11, 15, ura3, GAL, psi+</i>                                                                                                                                    |
| K11850 | MATa, <i>ura3::SMC1-Myc9::URA3</i>                                                                                                                                                                                  |
| K11852 | MATa, <i>ura3::smc1K39I-Myc9::URA3</i>                                                                                                                                                                              |
| K11854 | MATa, <i>ura3::smc1S1130R-Myc9::URA3</i>                                                                                                                                                                            |
| K11857 | MATa, <i>ura3::smc1E1158Q-Myc9::URA3</i>                                                                                                                                                                            |
| K11872 | MATa, <i>leu2::smc3K38I-HA3::LEU2</i>                                                                                                                                                                               |
| K11874 | MATa, <i>leu2::smc3S1128R-HA3::LEU2</i>                                                                                                                                                                             |
| K13560 | MATa, <i>leu2::SMC3-HA3::LEU2</i>                                                                                                                                                                                   |
| K13561 | MATa, <i>leu2::smc3E1155Q-HA3::LEU2</i>                                                                                                                                                                             |
| K13585 | MATa, <i>ura3::Smc3-MP1-hinge (259-263)-HA3 &amp; Smc1-p14-hinge (250-251)::URA3</i>                                                                                                                                |
| K14133 | MATa, <i>ura3::SMC1-Myc9::URA3, leu2::SMC3HA3::LEU2</i>                                                                                                                                                             |
| K14134 | MATa, <i>ura3::smc1(F584R)-Myc9::URA3, leu2::SMC3HA3::LEU2</i>                                                                                                                                                      |
| K14601 | MATa, <i>Scc1-PK9::KanMX,</i>                                                                                                                                                                                       |
| K14134 | MATa, <i>Scc1-PK9::KanMX, scc2-4</i>                                                                                                                                                                                |
| K16331 | MATa, <i>bar1::hisG, UBR1::GAL1, 10p-Glu-UBR1/CMVp-tTA(HIS3), LEU2::pCM244</i>                                                                                                                                      |
| K16335 | MATa, <i>bar1::hisG, UBR1::GAL1, 10p-Glu-UBR1/CMVp-tTA(HIS3), leu2::pCM244, SMC1::kanMX-tetO2p-DHFRts-HA3-Smc1, ura3::SMC1-Myc9::URA3, TRP1-ARS1-CEN1(7.5kb minichromosome)</i>                                     |
| K16336 | MATa, <i>bar1::hisG, UBR1::GAL1, 10p-Glu-UBR1/CMVp-tTA(HIS3), LEU2::pCM244, SMC1::kanMX-tetO2p-DHFRts-HA3-Smc1, ura3::smc1K39I-Myc9::URA3, TRP1-ARS1-CEN1(7.5kb minichromosome)</i>                                 |
| K16337 | MATa, <i>bar1::hisG, UBR1::GAL1, 10p-Glu-UBR1/CMVp-tTA(HIS3), LEU2::pCM244, SMC1::kanMX-tetO2p-DHFRts-HA3-Smc1, ura3::smc1E1158Q-Myc9::URA3, TRP1-ARS1-CEN1(7.5kb minichromosome)</i>                               |
| K16338 | MATa, <i>bar1::hisG, UBR1::GAL1, 10p-Glu-UBR1/CMVp-tTA(HIS3), LEU2::pCM244, SMC1::kanMX-tetO2p-DHFRts-HA3-Smc1, ura3::Ylplac211, TRP1-ARS1-CEN1(7.5kb minichromosome)</i>                                           |
| K16340 | MATa, <i>bar1::hisG, UBR1::GAL1, 10p-Glu-UBR1/CMVp-tTA(HIS3), LEU2::pCM244, SMC3::kanMX-tetO2p-DHFRts-HA3-Smc3</i>                                                                                                  |
| K16442 | MATa/ $\alpha$ , <i>Scc2-GFP::KanMX/Scc2-GFP::KanMX, Mtw1-RFP::KanMX/Mtw1-RFP::KanMX</i>                                                                                                                            |
| K16443 | MATa/ $\alpha$ , <i>Scc4-GFP::KanMX/Scc4-GFP::KanMX, Mtw1-RFP::KanMX/Mtw1-RFP::KanMX</i>                                                                                                                            |
| K16444 | MATa/ $\alpha$ , <i>ura3::SMC1-GFP::URA3/ura3::SMC1-GFP::URA3, Mtw1-RFP::KanMX/Mtw1-RFP::KanMX</i>                                                                                                                  |
| K16445 | MATa/ $\alpha$ , <i>ura3::smc1E1158Q-GFP::URA3/ura3::smc1E1158Q-GFP::URA3, Mtw1-RFP::KanMX/Mtw1-RFP::KanMX</i>                                                                                                      |
| K16535 | MATa/ $\alpha$ , <i>ura3::3XtetO112::URA3, Scc2-PK1-TEV3-TETR::KANMX, Scc4-GFP::KANMX, Mtw1-RFP::KanMX/Mtw1-RFP::KanMX</i>                                                                                          |
| K16536 | MATa/ $\alpha$ , <i>ura3::SMC1-GFP::URA3/ura3::3XtetO112::URA3, Scc2-PK1-TEV3-TETR::KANMX, Mtw1-RFP::KanMX/Mtw1-RFP::KanMX</i>                                                                                      |
| K16537 | MATa/ $\alpha$ , <i>ura3::smc1E1158Q-GFP::URA3/ura3::3XtetO112::URA3, Scc2-PK1-TEV3-TETR::KANMX, Mtw1-RFP::KanMX/Mtw1-RFP::KanMX</i>                                                                                |
| K16586 | MATa, <i>Scc1-PK9::KanMX, R-CEN-R:CHRXIV, LEU2::pGal-recombinase;</i>                                                                                                                                               |
| K16634 | MATa, <i>SCC3-myc18::TRP1, leu2::scc1(<math>\Delta</math>319-327)-HA3::LEU2</i>                                                                                                                                     |
| K16670 | MATa, <i>Scc1-PK9::KanMX, LEU2::pGal-recombinase; the endogenous cen14 was excised and cen14(332bp)-KIURA3 was integrated between ADE12 and ALG9</i>                                                                |
| K16715 | MATa/ $\alpha$ , <i>leu2::smc1E1158Q-GFP::LEU2/leu2::smc3E1155Q-GFP::LEU2, Mtw1-RFP::KanMX/Mtw1-RFP::KanMX</i>                                                                                                      |
| K16716 | MATa/ $\alpha$ , <i>leu2::smc3K38I-GFP::LEU2/leu2::smc3K38I-GFP::LEU2, Mtw1-RFP::KanMX/Mtw1-RFP::KanMX</i>                                                                                                          |
| K16764 | MATa/ $\alpha$ , <i>trp1::SCC1-GFP::TRP1/trp1::SCC1-GFP::TRP1, ura3::Smc1E1158Q-Myc9::URA3/ura3::Smc1E1158Q-Myc9::URA3, Mtw1-RFP::KanMX/Mtw1-RFP::KanMX</i>                                                         |
| K16765 | MATa/ $\alpha$ , <i>trp1::scc1(V81K)-GFP::TRP1/trp1::scc1(V81K)-GFP::TRP1, ura3::Smc1E1158Q-Myc9::URA3/ura3::Smc1E1158Q-Myc9::URA3, Mtw1-RFP::KanMX/Mtw1-RFP::KanMX</i>                                             |
| K16766 | MATa/ $\alpha$ , <i>trp1::scc1(L75K)-GFP::TRP1/trp1::scc1(L75K)-GFP::TRP1, ura3::Smc1E1158Q-Myc9::URA3/ura3::Smc1E1158Q-Myc9::URA3, Mtw1-RFP::KanMX/Mtw1-RFP::KanMX</i>                                             |
| K16767 | MATa/ $\alpha$ , <i>trp1::scc1(V89K)-GFP::TRP1/trp1::scc1(V89K)-GFP::TRP1, ura3::Smc1E1158Q-Myc9::URA3/ura3::Smc1E1158Q-Myc9::URA3, Mtw1-RFP::KanMX/Mtw1-RFP::KanMX</i>                                             |
| K16780 | MATa, <i>ura3::SMC1-Myc9::URA3, rad61::NatMX4</i>                                                                                                                                                                   |
| K16782 | MATa, <i>ura3::smc1E1158Q-Myc9::URA3, rad61::NatMX4</i>                                                                                                                                                             |
| K16795 | MATa/ $\alpha$ , <i>ura3::SMC1-GFP::URA3/ura3::SMC1-GFP::URA3, Mtw1-RFP::KanMX/Mtw1-RFP::KanMX, rad61::NatMX4/rad61::NatMX4</i>                                                                                     |
| K16796 | MATa/ $\alpha$ , <i>ura3::smc1E1158Q-GFP::URA3/ura3::smc1E1158Q-GFP::URA3, Mtw1-RFP::KanMX/Mtw1-RFP::KanMX, rad61::NatMX4/rad61::NatMX4</i>                                                                         |
| K16799 | MATa, <i>bar1::hisG, UBR1::GAL1, 10p-Glu-UBR1/CMVp-tTA(HIS3), LEU2::pCM244, SCC2::kanMX-tetO2p-DHFRts-HA3-SCC2, ura3::SMC1-Myc9::URA3</i>                                                                           |
| K16800 | MATa, <i>bar1::hisG, UBR1::GAL1, 10p-Glu-UBR1/CMVp-tTA(HIS3), LEU2::pCM244, SCC2::kanMX-tetO2p-DHFRts-HA3-SCC2, ura3::smc1E1158Q-Myc9::URA3</i>                                                                     |
| K16811 | MATa, <i>bar1::hisG, UBR1::GAL1, 10p-Glu-UBR1/CMVp-tTA(HIS3), LEU2::pCM244, ura3::SMC1-Myc9::URA3</i>                                                                                                               |
| K16812 | MATa, <i>bar1::hisG, UBR1::GAL1, 10p-Glu-UBR1/CMVp-tTA(HIS3), LEU2::pCM244, ura3::smc1E1158Q-Myc9::URA3</i>                                                                                                         |
| K16874 | MATa, <i>ura3::smc1E1158QP14-Myc9::URA3, leu2::Smc3MP1-HA3::LEU2</i>                                                                                                                                                |
| K16895 | MATa/ $\alpha$ , <i>ura3::smc1(F584R/E1158Q)-GFP::URA3/ura3::smc1(F584R/E1158Q)-GFP::URA3, leu2::SMC3-HA3::LEU2/leu2::SMC3-HA3::LEU2, Mtw1-RFP::KanMX/Mtw1-RFP::KanMX</i>                                           |
| K16915 | MATa/ $\alpha$ , <i>trp1::scc1(<math>\Delta</math>319-327)-GFP::TRP1/trp1::scc1(<math>\Delta</math>319-327)-GFP::TRP1, ura3::Smc1E1158Q-Myc9::URA3/ura3::Smc1E1158Q-Myc9::URA3, Mtw1-RFP::KanMX/Mtw1-RFP::KanMX</i> |
| K16921 | MATa/ $\alpha$ , <i>ura3::smc1K39I-GFP::URA3/ura3::smc1K39I-GFP::URA3, Mtw1-RFP::KanMX/Mtw1-RFP::KanMX</i>                                                                                                          |
| K16946 | MATa/ $\alpha$ , <i>ura3::SMC1-GFP::URA3/ura3::SMC1-GFP::URA3, leu2::SMC3-HA3::LEU2/leu2::SMC3-HA3::LEU2, Mtw1-RFP::KanMX/Mtw1-RFP::KanMX</i>                                                                       |
| K16963 | MATa/ $\alpha$ , <i>ura3::smc1E1158QP14-GFP::URA3/ura3::smc1E1158QP14-GFP::URA3, leu2::smc3MP1-HA3::LEU2/leu2::smc3MP1-HA3::LEU2, Mtw1-RFP::KanMX/Mtw1-RFP::KanMX</i>                                               |
| K16964 | MATa/ $\alpha$ , <i>ura3::smc1P14-GFP::URA3/ura3::smc1P14-GFP::URA3, leu2::smc3MP1-HA3::LEU2/leu2::smc3MP1-HA3::LEU2, Mtw1-RFP::KanMX/Mtw1-RFP::KanMX</i>                                                           |
| K16968 | MAT $\alpha$ , <i>SCC3-myc18::TRP1, leu2::SCC1-HA3::LEU2</i>                                                                                                                                                        |
| K16982 | MATa/ $\alpha$ , <i>ura3::SMC1-GFP::URA3/ura3::SMC1-GFP::URA3, Mtw1-RFP::KanMX/Mtw1-RFP::KanMX, chl4::hph/chl4::hph</i>                                                                                             |
| K16983 | MATa/ $\alpha$ , <i>ura3::smc1E1158Q-GFP::URA3/ura3::smc1E1158Q-GFP, Mtw1-RFP::KanMX/Mtw1-RFP::KanMX, chl4::hph/chl4::hph</i>                                                                                       |
| K17000 | MATa, <i>ura3::smc1(F584R/E1158Q)-Myc9::URA3, leu2::SMC3-HA3::LEU2</i>                                                                                                                                              |
| K17026 | MATa/ $\alpha$ , <i>ura3::smc1E1158Q-RFP::URA3/ura3::smc1E1158Q-RFP, Scc2-GFP::KanMX/Scc2-GFP::KanMX, Mtw1-RFP::KanMX/Mtw1-RFP::KanMX</i>                                                                           |
| K17027 | MATa/ $\alpha$ , <i>ura3::smc1E1158Q-RFP::URA3/ura3::smc1E1158Q-RFP Scc4-GFP::KanMX/Scc4-GFP::KanMX, Mtw1-RFP::KanMX/Mtw1-RFP::KanMX</i>                                                                            |
| K17070 | MATa/ $\alpha$ , <i>ura3::smc1E1158Q-GFP::URA3/ura3::smc1E1158Q-GFP::URA3, leu2::SMC3-HA3::LEU2/leu2::SMC3-HA3::LEU2, Mtw1-RFP::KanMX/Mtw1-RFP::KanMX</i>                                                           |
| K17226 | MATa/ $\alpha$ , <i>Scc2-GFP::KanMX/Scc2-GFP::KanMX, Mtw1-RFP::KanMX/Mtw1-RFP::KanMX, chl4::hph/chl4::hph</i>                                                                                                       |



|               |                                                                                                                                                                             |
|---------------|-----------------------------------------------------------------------------------------------------------------------------------------------------------------------------|
| <b>K17227</b> | <i>MATa/α, Scc4-GFP::KanMX/Scc4-GFP::KanMX, Mtw1-RFP::KanMX/Mtw1-RFP::KanMX, chl4::hph/chl4::hph</i>                                                                        |
| <b>K17240</b> | <i>MATa, bar1::hisG, UBR1::GAL1, 10p-Glu-UBR1/CMVp-tTA(HIS3), LEU2::pCM244, SMC3::kanMX-tetO2p-DHFRts-HA3-Smc3, ura3::smc1E1158Q-Myc9::URA3, trp1::Ylplac204</i>            |
| <b>K17241</b> | <i>MATa, bar1::hisG, UBR1::GAL1, 10p-Glu-UBR1/CMVp-tTA(HIS3), LEU2::pCM244, SMC3::kanMX-tetO2p-DHFRts-HA3-Smc3, ura3::smc1E1158Q-Myc9::URA3, trp1::SMC3-HA3::TRP1</i>       |
| <b>K17242</b> | <i>MATa, bar1::hisG, UBR1::GAL1, 10p-Glu-UBR1/CMVp-tTA(HIS3), LEU2::pCM244, SMC3::kanMX-tetO2p-DHFRts-HA3-Smc3, ura3::smc1E1158Q-Myc9::URA3, trp1::smc3E1155Q-HA3::TRP1</i> |
| <b>K17299</b> | <i>MATa, bar1::hisG, UBR1::GAL1, 10p-Glu-UBR1/CMVp-tTA(HIS3), LEU2::pCM244, SCC3::kanMX-tetO2p-DHFRts-HA3-SCC3, ura3::smc1E1158Q-Myc9::URA3</i>                             |
| <b>K17300</b> | <i>MATa, bar1::hisG, UBR1::GAL1, 10p-Glu-UBR1/CMVp-tTA(HIS3), LEU2::pCM244, PDS5::kanMX-tetO2p-DHFRts-HA3-PDS5, ura3::smc1E1158Q-Myc9::URA3</i>                             |
| <b>K17458</b> | <i>S288C, MATa, his3Δ1, leu2Δ0, met15Δ0, ura3Δ0, trp1Δ::hisG, SCC2-6His-6FLAG-loxP-KanMX-loxP</i>                                                                           |
| <b>K17459</b> | <i>S288C, MATa, his3Δ1, leu2Δ0, met15Δ0, ura3Δ0, trp1Δ::hisG, SCC4-6PK::TRP1</i>                                                                                            |
| <b>K17460</b> | <i>S288C, MATa, his3Δ1, leu2Δ0, met15Δ0, ura3Δ0, trp1Δ::hisG, RPO21-6His-3FLAG-loxP-KanMX-loxP</i>                                                                          |
| <b>K18393</b> | <i>S288C, MATa, his3Δ1, leu2Δ0, met15Δ0, ura3Δ0, trp1Δ::hisG, RPC128-6His-6FLAG-loxP-KanMX-loxP</i>                                                                         |
| <b>K18394</b> | <i>S288C, MATa, his3Δ1, leu2Δ0, met15Δ0, ura3Δ0, trp1Δ::hisG, SPT15-6His-6FLAG-loxP-KanMX-loxP</i>                                                                          |

**Table S3.** List of ChIP-qPCR primers used for chromosome VI

| Name           | Position | Forward                    | Reverse                    |
|----------------|----------|----------------------------|----------------------------|
| cen            | DEG1     | 5'-GCGGCCTTAAGTTCGTAGTG-3' | 5'-AAGTGCCGAAATTGTCTTG-3'  |
| Inner pericen  | SPB4     | 5'-GACGAAAGAACGGAACTCG-3'  | 5'-CCTTGGATAGCTTTGCTGGA-3' |
| Outer pericen  | MSH4     | 5'-CCAGGATAGCCACTGCTCT-3'  | 5'-CGATGACGTCGCTACACTT-3'  |
| Inner arm      | CMK1     | 5'-ACGGTTCAGTTCCTCCATTG-3' | 5'-TGCAAAAGCTTTGCTGGTTA-3' |
| Outer arm      | PAU5     | 5'-ACTCCGAGATTCTTGCTCCA-3' | 5'-GCAGCAAATGTTGGGATTTA-3' |
| Lower cohesion | FAB1     | 5'-CCAGATGGCTCACAT-3'      | 5'-GCTCAGAATTGGGTTTGTC-3'  |

### Supplemental Reference

Katou, Y., Kanoh, Y., Bando, M., Noguchi, H., Tanaka, H., Ashikari, T., Sugimoto, K., Shirahige, K. (2003) S-phase checkpoint proteins Tof1 and Mrc1 form a stable replication-pausing complex. *Nature* 424:1078-1083.

### Accession Numbers

All data were available from NCBI SRA (Sequence Read Archive) database with series number of SRP004703.
